# Supplementary material
Source: PubMed Central journal article supplement (PMC4358443)
Supplement: ijcem0008-0188-f7.pdf [file ijcem0008-0188-f7.pdf]

## PKCε on bone marrow mesenchymal stem cells

**Supplementary Table 1.** Primer sequences

| Name       | Sequence                  | Primer length | Tm   | Product length |
|------------|---------------------------|---------------|------|----------------|
| PI3K-F     | ATACCGTCAGCAGTTTGTCTC     | 21            | 55.4 | 212            |
| PI3K-R     | GCATCCAAGGGTCCAGTTAGT     | 21            | 58.2 |                |
| PKCε-F     | AAGGTGTTAGGCAAAGGCAG      | 20            | 57.3 | 192            |
| PKCε-R     | GCAGCAATAGAGTTGGGTTAG     | 21            | 54.8 |                |
| AKT-F      | TTTGGGAAGGTGATCCTGGTG     | 21            | 62   | 184            |
| AKT-R      | GGTCGTGGGTCTGGAATGAGT     | 21            | 60.9 |                |
| CXCR4-F    | TCTTCTTACTGGCATAGTGG      | 21            | 55.3 | 224            |
| CXCR4-R    | GCTGTAAAGGTTGACGGTGTA     | 21            | 55.6 |                |
| SDF-1F     | CTGAATAGTGGCTCCCAAGGTT    | 22            | 60.1 | 151            |
| SDF-1R     | GTGGATCTCGCTCTCCCTGAC     | 22            | 62.5 |                |
| P38/MAPK-F | GGTTTTGGACTCGGATAAGA      | 20            | 54.3 | 246            |
| P38/MAPK-R | GTGGGATGGACAGAACAGAAG     | 21            | 56.6 |                |
| JNK-F      | TTTGGGAAGGTGATCCTGGTG     | 20            | 52.6 | 217            |
| JNK-R      | TTTGGACGCATCTATCACC       | 19            | 53.7 |                |
| β-actin-F  | GGAGATTACTGCCCTGGCTCCTAGC | 25            | 60.1 | 155            |
| β-actin-R  | GGCCGGACTCATCGTACTCCTGCTT | 25            | 62   |                |

**Supplementary Table 2.** Conditions of the primary antibody incubation

| Primary antibody | resource   | dilution ratio | Incubation condition |
|------------------|------------|----------------|----------------------|
| CD29 antibody    | RabMAbs    | 1:20           | 37 °C 30 min         |
| CD34 antibody    | Santa Cruz | 1:20           | 37 °C 30 min         |
| CD44 antibody    | Santa Cruz | 1:20           | 37 °C 30 min         |
| CD45 antibody    | Santa Cruz | 1:20           | 37 °C 30 min         |
| PKCε antibody    | Santa Cruz | 1:100          | 4 °C overnight       |
| p-JNK antibody   | Santa Cruz | 1:100          | 4 °C overnight       |
| JNK antibody     | Santa Cruz | 1:100          | 4 °C overnight       |
| p-P38 antibody   | Santa Cruz | 1:100          | 4 °C overnight       |
| P38 antibody     | Santa Cruz | 1:100          | 4 °C overnight       |
| SDF-1 antibody   | Santa Cruz | 1:100          | 4 °C overnight       |
| CXCR4 antibody   | Santa Cruz | 1:100          | 4 °C overnight       |
| PI3K antibody    | Santa Cruz | 1:100          | 4 °C overnight       |
| p-AKT antibody   | Santa Cruz | 1:100          | 4 °C overnight       |
| AKT antibody     | Santa Cruz | 1:100          | 4 °C overnight       |

## PKCε on bone marrow mesenchymal stem cells

**Supplementary Table 3.** Conditions of the second antibody incubation

| Primary antibody | Secondary antibody                          | dilution ratio | Incubation condition                     |
|------------------|---------------------------------------------|----------------|------------------------------------------|
| CD29 antibody    | FITC-labeled anti-rabbit secondary antibody | 1:20           | room temperature, away from light 30 min |
| CD34 antibody    | FITC-labeled anti-mouse secondary antibody  | 1:20           | room temperature, away from light 30 min |
| CD44 antibody    | FITC-labeled anti-mouse secondary antibody  | 1:20           | room temperature, away from light 30 min |
| CD45 antibody    | FITC-labeled anti- mouse secondary antibody | 1:20           | room temperature, away from light 30 min |
| PKCε antibody    | Goat anti-mouse IgG-HRP                     | 1:5000         | 37 °C 45 min                             |
| p-JNK antibody   | Goat anti-mouse IgG-HRP                     | 1:5000         | 37 °C 45 min                             |
| JNK antibody     | Goat anti-mouse IgG-HRP                     | 1:5000         | 37 °C 45 min                             |
| p-P38 antibody   | Goat anti-rabbit IgG-HRP                    | 1:5000         | 37 °C 45 min                             |
| P38 antibody     | Goat anti-rabbit IgG-HRP                    | 1:5000         | 37 °C 45 min                             |
| SDF-1 antibody   | Goat anti-rabbit IgG-HRP                    | 1:5000         | 37 °C 45 min                             |
| CXCR4 antibody   | Goat anti-rabbit IgG-HRP                    | 1:5000         | 37 °C 45 min                             |
| PI3K antibody    | Goat anti-rabbit IgG-HRP                    | 1:5000         | 37 °C 45 min                             |
| p-AKT antibody   | Goat anti-rabbit IgG-HRP                    | 1:5000         | 37 °C 45 min                             |
| AKT antibody     | Goat anti-rabbit IgG-HRP                    | 1:5000         | 37 °C 45 min                             |
